# Supplementary material for: Response surface optimization of ionic liquid pretreatments for maximizing cellulose nanofibril production
Source: Royal Society of Chemistry journal article supplement (doi:10.1039/d3ra06930c), 2023-01-01
Supplement: d3ra06930c1.pdf [file d3ra06930c1.pdf]

## Electronic supplementary information

### Response surface optimization of ionic liquid pretreatments for maximizing cellulose nanofibril production

Xincheng Peng<sup>a,1</sup>, Deqin Zhu<sup>a,1</sup>, Jingjing Liu<sup>a</sup>, Ligang Wei<sup>a\*</sup>, Na Liu<sup>a</sup>, Li Wei<sup>a</sup>, Guolin Shao<sup>a\*</sup>, Qingda An<sup>a,b</sup>

<sup>a</sup> School of Light Industry and Chemical Engineering, Dalian Polytechnic University, Dalian 116034, China

<sup>b</sup> Liaoning Key Laboratory of Lignocellulosic Chemistry and Biomaterials, College of Light Industry and Chemical Engineering, Dalian Polytechnic University, Dalian 116034, China

---

\* Corresponding author. Tel: +86 0411 86323726. Email address: weilg@dlpu.edu.cn (L. Wei), shaoguolin@dlpu.edu.cn (G. Shao).

<sup>1</sup> Author Contributions: These two authors contributed equally to this paper.

**Table S1** Experimental levels of the factor variables used in the pretreatment process

| Coded | Variable                     | Levels |     |     |
|-------|------------------------------|--------|-----|-----|
|       |                              | -1     | 0   | 1   |
| A     | pretreatment time(h)         | 2      | 3   | 4   |
| B     | pretreatment temperature(°C) | 100    | 110 | 120 |
| C     | liquid-solid ratio (g/g)     | 60     | 80  | 100 |
| D     | PIL content(%)               | 20     | 30  | 40  |

**Table S2** Analysis of variance of regression equation

| Source         | Sum of squares | Degree of freedom | Mean square | F-value | P-value | Significance   |
|----------------|----------------|-------------------|-------------|---------|---------|----------------|
| Model          | 3158.63        | 14                | 225.62      | 35.51   | <0.0001 | Saliience      |
| A              | 154.80         | 1                 | 154.80      | 24.37   | 0.0003  | **             |
| B              | 810.16         | 1                 | 810.16      | 127.52  | <0.0001 | *              |
| C              | 58.96          | 1                 | 58.96       | 9.28    | 0.0102  | *              |
| D              | 54.19          | 1                 | 54.19       | 8.53    | 0.0128  | *              |
| AB             | 2.89           | 1                 | 2.89        | 0.45    | 0.5128  |                |
| AC             | 31.92          | 1                 | 31.92       | 5.02    | 0.0447  | *              |
| AD             | 141.61         | 1                 | 141.61      | 22.29   | 0.0005  | **             |
| BC             | 0.72           | 1                 | 0.72        | 0.11    | 0.7418  |                |
| BD             | 35.40          | 1                 | 35.40       | 5.57    | 0.0360  | *              |
| CD             | 72.25          | 1                 | 72.25       | 11.37   | 0.0055  | **             |
| A <sup>2</sup> | 194.68         | 1                 | 194.68      | 30.64   | 0.0001  | **             |
| B <sup>2</sup> | 1772.28        | 1                 | 1772.28     | 278.96  | <0.0001 | **             |
| C <sup>2</sup> | 132.22         | 1                 | 132.22      | 20.81   | 0.0007  | **             |
| D <sup>2</sup> | 291.40         | 1                 | 291.40      | 45.87   | <0.0001 | **             |
| Residual       | 76.24          | 12                | 6.35        |         |         |                |
| Lack of fit    | 74.31          | 10                | 7.43        | 7.71    | 0.1201  | Insignificance |
| Pure error     | 1.93           | 2                 | 0.96        |         |         |                |
| Total          | 3234.87        | 26                |             |         |         |                |

(Note: \*\* indicate highly significant difference  $p < 0.01$ , \* indicate significant difference  $p < 0.05$ )
